# Supplementary material for: The Nuclear Protein HOXB13 Enhances Methylmercury Toxicity by Inducing Oncostatin M and Promoting Its Binding to TNFR3 in Cultured Cells
Source: PubMed Central journal article supplement (PMC7017003; doi:10.3390/cells9010045), 2019-12-23
Supplement: cells-09-00045-s001.pdf [file cells-09-00045-s001.pdf]

Primers used in this study

| Target             | Sequence                                |
|--------------------|-----------------------------------------|
| Human GAPDH        | Forward (5'-3') GCACCGTCAAGGCTGAGAAC    |
|                    | Reverse (5'-3') TGGTGAAGACGCCAGTGGGA    |
| Human HOXB13       | Forward (5'-3') CAGATGTGTTGCCAGGGAGAAC  |
|                    | Reverse (5'-3') AGGCGTCAGGAGGGTGCT      |
| Human OSM          | Forward (5'-3') CTCTGAGACTTGGTTTACCTG   |
|                    | Reverse (5'-3') TGTGTCTCAGCTCTGTCTA     |
| Human RFPL4A       | Forward (5'-3') TGAACCGACAGGGGAAGATTG   |
|                    | Reverse (5'-3') CAGGGCTCGCAACAGGAAT     |
| Human HSPA6        | Forward (5'-3') CAAGTGGCGTATGCTAC       |
|                    | Reverse (5'-3') GCTCATTGATGATCCGCAACAC  |
| Human RASD1        | Forward (5'-3') AGCTGAGTATCCCGCCAA      |
|                    | Reverse (5'-3') CGATGGTAGCGTGTAGGC      |
| Human TNFR1a       | Forward (5'-3') GAGAGGCCATAGCTGTCTGG    |
|                    | Reverse (5'-3') CTTCCTTTGTGGCACTTGGT    |
| Human TNFR1b       | Forward (5'-3') GGCAAGTCCCTGACTCTCTG    |
|                    | Reverse (5'-3') AGAAAAGGATGCTGGGTTT     |
| Human TNFR3        | Forward (5'-3') AAGGATTGCTGGTGCATC      |
|                    | Reverse (5'-3') GAATCCTACCAACCCCTA      |
| Human TNFR4        | Forward (5'-3') CCTCAGAAGTGGGAGTGAGC    |
|                    | Reverse (5'-3') CAGATTGCGTCCGAGCTATT    |
| Human TNFR5        | Forward (5'-3') GCAGGACAAACAAAGACTGA    |
|                    | Reverse (5'-3') TCGTCGGGAAAATTTGATCTC   |
| Human TNFR6        | Forward (5'-3') TCAGTACGGAGTTGGGGAAG    |
|                    | Reverse (5'-3') ACCTGGAGGACAGGGCTTAT    |
| Human TNFR7        | Forward (5'-3') CCAGCATGAAAAGGCTGCTC    |
|                    | Reverse (5'-3') GGGTTTTGGAAGAGGATCACA   |
| Human TNFR8        | Forward (5'-3') CTTCGGGTGATCCTGGTGT     |
|                    | Reverse (5'-3') CATCAGTGGCTGGCTCATT     |
| Human TNFR9        | Forward (5'-3') CACTCTGTTGCTGGTCTCA     |
|                    | Reverse (5'-3') ACAGGTCCTTTGTCCACCTG    |
| Human TNFR10a      | Forward (5'-3') ACAGCAATGGGAACATAGCC    |
|                    | Reverse (5'-3') TGGTGCAGGACTTCTCTCT     |
| Human TNFR10b      | Forward (5'-3') TGCAGCGTAGTCTTGATTG     |
|                    | Reverse (5'-3') TCCTGGACTTCCATTTCTCT    |
| Human TNFR10c      | Forward (5'-3') AAAGTTCCTGCACCATGACC    |
|                    | Reverse (5'-3') TGGCACCAAATCTTCAACA     |
| Human TNFR10d      | Forward (5'-3') TCCAAATATGGGGAGCTTAC    |
|                    | Reverse (5'-3') CCTGCCTCAGCCTATCAAAG    |
| Human TNFR11a      | Forward (5'-3') GGTGCAGCCTCTAACTCCTG    |
|                    | Reverse (5'-3') GTTTGAGACCAGGCTGGGTA    |
| Human TNFR11b      | Forward (5'-3') GGAACACAGCTCACAAGAA     |
|                    | Reverse (5'-3') CGGTAAGCTTTCCATCAAGC    |
| Human TNFR14       | Forward (5'-3') AGGAATGTGACACCAGACC     |
|                    | Reverse (5'-3') TCACCTTCTGCCTCCTGTCT    |
| Human TNFR16       | Forward (5'-3') GTGGACAGAGTCTGGGTGT     |
|                    | Reverse (5'-3') AAGGAGGGGAGGTGATAGGA    |
| Human TNFR17       | Forward (5'-3') AGCAGGGGAAAGTTCATTGT    |
|                    | Reverse (5'-3') GCAAGCATGCAACAACTGT     |
| Human TNFR18       | Forward (5'-3') GAGTGGACTGCATGTGTGT     |
|                    | Reverse (5'-3') TGCACTGTGTCGCAAGTTTG    |
| Human TNFR19       | Forward (5'-3') TCCGTGAGAACACACCACAT    |
|                    | Reverse (5'-3') GCACCGTCTCTTAAATCCA     |
| Human TNFR21       | Forward (5'-3') GTGAACAAGACCCTCCAAA     |
|                    | Reverse (5'-3') CAGCAGGAAAAGCACAATCA    |
| Human TNFR25       | Forward (5'-3') CACCCTCTAGCACCTCCTG     |
|                    | Reverse (5'-3') TCCATCACGTCGTAGAGGTG    |
| Human LIFR         | Forward (5'-3') TGGAACGACAGGGGTTTCACT   |
|                    | Reverse (5'-3') GAGTTGTGTTGTTGGTCACTAA  |
| Human OSMR         | Forward (5'-3') ATGGCTCTATTGTCAGTCTTTCA |
|                    | Reverse (5'-3') CACCCAGATGACATTGGATGTT  |
| Firefly luciferase | Forward (5'-3') CGCACATATCGAGGTGGACA    |
|                    | Reverse (5'-3') GCAAGCTATTCTCGCTGCAC    |
| Mouse GAPDH        | Forward (5'-3') AACTTTGGCATTGTGGAAGG    |
|                    | Reverse (5'-3') ACACATTGGGGGTAGGAACA    |
| Mouse HOXB13       | Forward (5'-3') TCTTGCCGAGTATCCAGGAG    |
|                    | Reverse (5'-3') GGAGTTTCCGAAAGGGTAGGTAG |
| Mouse OSM          | Forward (5'-3') ATGCAGACAGGGCTTCTAAGA   |
|                    | Reverse (5'-3') TTGGAGCAGCCACGATTGG     |
| Mouse TNFR3        | Forward (5'-3') CCCCTTATCGCATAGAAAACCAG |
|                    | Reverse (5'-3') TGCATACCGAAAGACAACCT    |

siRNAs used in this study

| Target gene            | siRNA Sense Sequence (5'-3') | Location           |
|------------------------|------------------------------|--------------------|
| Negative control siRNA | AAUUCUCGACGUGUCACGU          | -                  |
| Human HOXB13           | UACGCUGAUGCCUGUCUGCAA        | (CDS: 276-297)     |
| Human OSM #1           | CACUGAGAAGUGCACUUUA          | (3'UTR: 1097-1115) |
| Human OSM #2           | UAAAGUGCACUUCUCAGUG          | (5'UTR: 87-105)    |
| Human RFPL4A #1        | CAACUGAGCCCAUGCUGAU          | (3'UTR: 1771-1795) |
| Human RFPL4A #2        | AUCAGCAUGGGCUCAGUUG          | (5'UTR: 67-85)     |
| Human TNFR1a #1        | ACCGCAUUUJUGGAGUGAAA         | (CDS: 676-686)     |
| Human TNFR1a #2        | ACGGUGGAAGUCCAAGCUCUA        | (CDS: 992-1012)    |
| Human TNFR3 #1         | GAUGAAGUUGGGAAGGGUA          | (3'UTR: 2038-2055) |
| Human TNFR3 #2         | UACCCUUCCEAACUUCUAC          | (5'UTR: 121-139)   |
| Human TNFR5 #1         | ACAGAGUUCACUGAAACGGAA        | (CDS: 231-251)     |
| Human TNFR5 #2         | UUGGUGCUGGUCUUUAUCAA         | (CDS: 643-663)     |
| Human TNFR6 #1         | AAGGACAUUACUAGUGACUCA        | (3'UTR: 1267-1287) |
| Human TNFR6 #2         | UUGGGAAGACUUGUACUACA         | (CDS: 455-475)     |
| Human TNFR9 #1         | CUGGUACAUUCUGUAUUA           | (CDS: 226-246)     |
| Human TNFR9 #2         | CAAGAACAACCAUCCUAUUA         | (3'UTR: 979-999)   |
| Human TNFR10b #1       | CCGACUUCACUUGAUUUA           | (3'UTR: 1885-1905) |
| Human TNFR10b #2       | CUGGACAACCUACAAGUUA          | (3'UTR: 2541-2561) |
| Human TNFR10c #1       | ACCAACGUUCCAACAUGAA          | (CDS: 427-447)     |
| Human TNFR10c #2       | AUCGUAGGGAUCAUAGUUCUA        | (CDS: 934-954)     |
| Human TNFR10d #1       | CCGGAGUGACAUCAAGUGCAA        | (CDS: 614-634)     |
| Human TNFR10d #2       | UAGAACGGGAUUUUCUUGUUA        | (3'UTR: 1814-1834) |
| Human TNFR16 #1        | AACGUUAAGUGAUGAACAUUA        | (3'UTR: 3356-3376) |
| Human TNFR16 #2        | AUGGCAUUCUUGACCUCUA          | (3'UTR: 3033-3053) |
| Human TNFR19 #1        | ACGAAACUUGUCGGUUUCAA         | (CDS: 437-457)     |
| Human TNFR19 #2        | UUGGAUUCAAUAGCAGUCA          | (CDS: 1103-1123)   |
| Human TNFR21 #1        | CUGAGCAUUGUACCAACACAA        | (CDS: 663-683)     |
| Human TNFR21 #2        | ACCGUGUAGAUGCUUGAUUA         | (3'UTR: 3082-3102) |
| Human TNFR25 #1        | CACCGUCAGUUGGUGGUA           | (CDS: 769-789)     |
| Human TNFR25 #2        | CGCGUAUUAAUUCUGUGAAA         | (3'UTR: 1611-1631) |
| Human LIFR             | UACGAAUCUUGAUUGCAAC          | (3'UTR: 2393-2411) |
| Human OSMR             | GCAUGAAAGGCAUCGUUCU          | (3'UTR: 5050-5068) |
| Mouse HOXB13 #1        | GAUGUGUUGCCAAGGUGAA          | (CDS: 672-691)     |
| Mouse HOXB13 #2        | GCUACCUACCUUCGGAAA           | (CDS: 446-465)     |
| Mouse TNFR3            | CUGUGACUGUACCCGGCAA          | (CDS: 1237-1256)   |
| Mouse OSM              | CUGAUCCGGUCUCUCUCU           | (CDS: 1286-1305)   |

Figure S1. Sequence of primers for quantitative PCR and siRNAs.

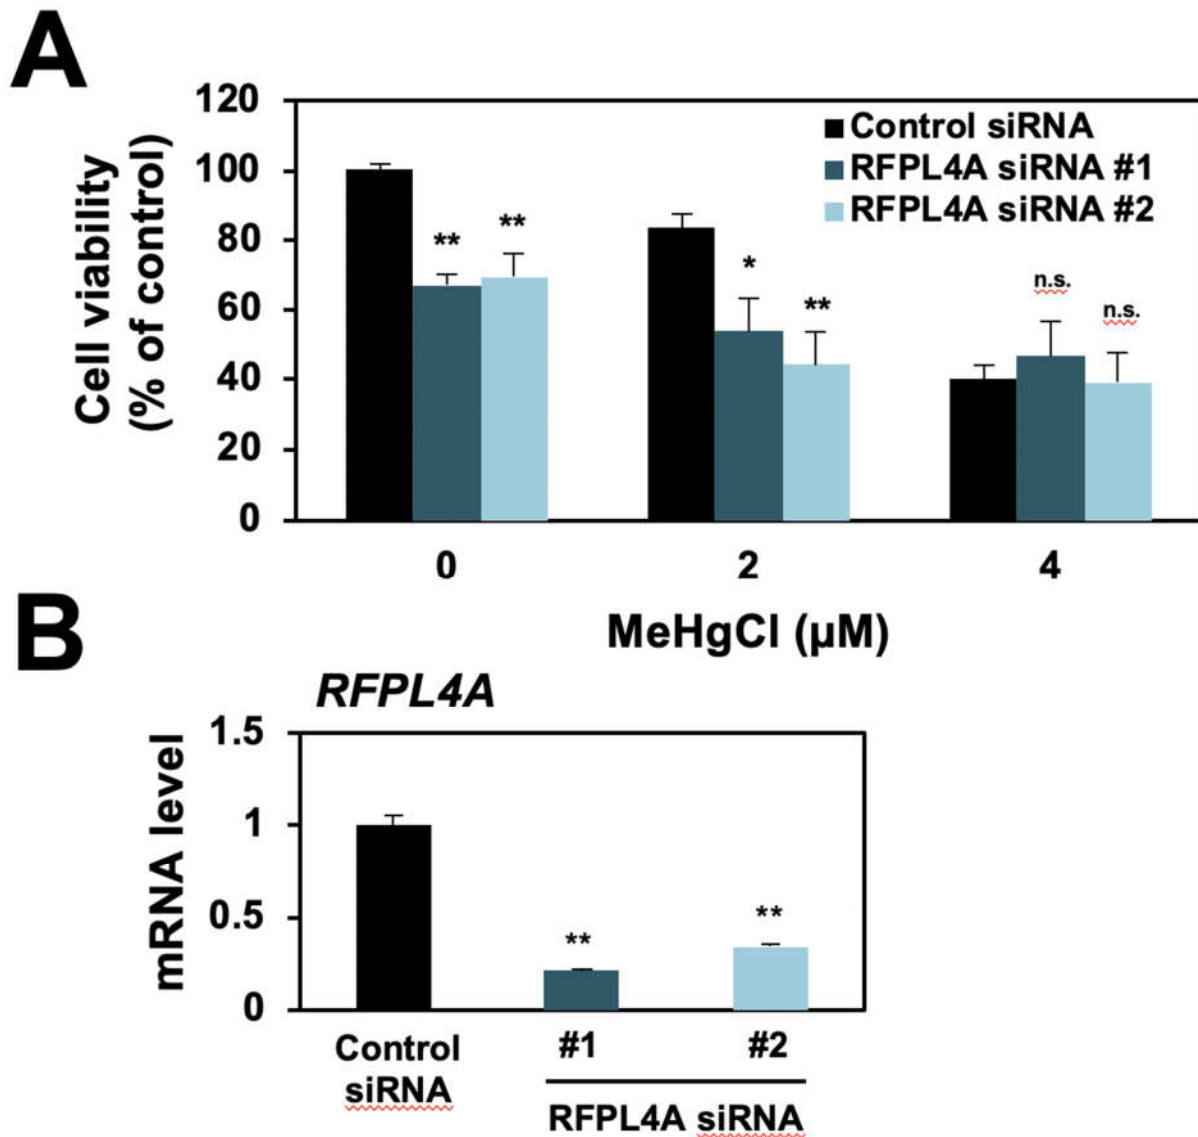

**Figure S2.** Effects of knockdown of RFPL4A or OSM on cytotoxicity caused by methylmercury. (A) HEK293 cells were transfected with 2 different sequence of RFPL4A siRNA (#1 or #2) for 48 h and cell viability was measured by alamarBlue assay. (B) Quantitative PCR for RFPL4A mRNA was performed. Represented data indicate relative value as control as 1, that normalized by each GAPDH mRNA level. All values are represented as mean  $\pm$  S.D. (n=3). \*P<0.05 vs control siRNA, \*\*P<0.01 vs control siRNA. n.s. indicates not significant.

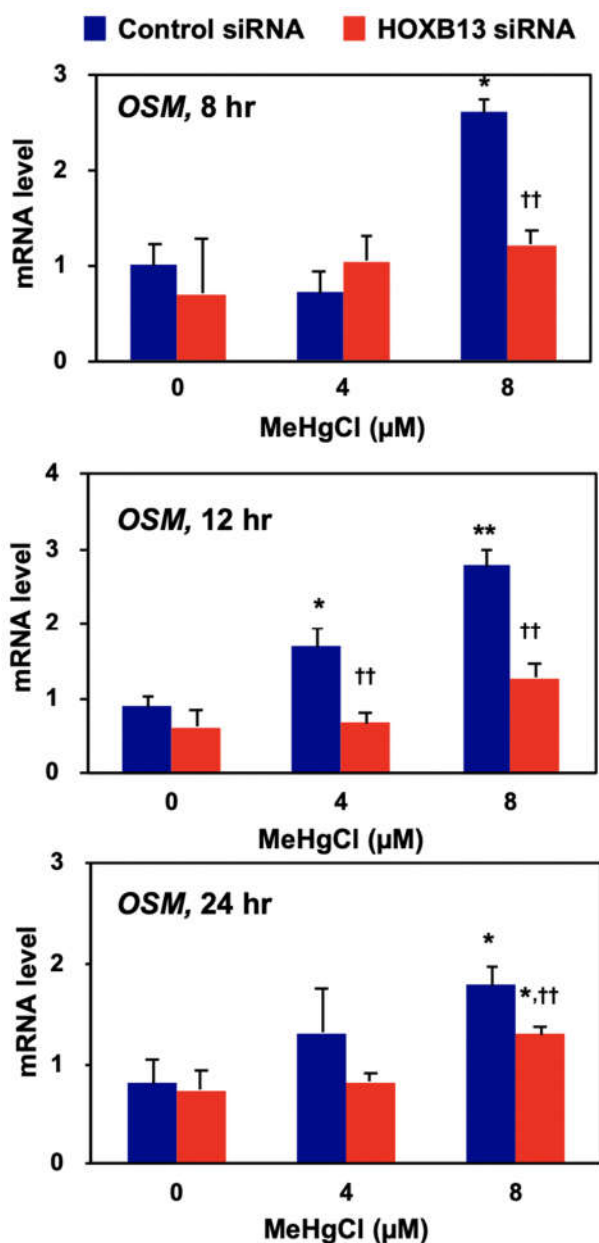

**Figure S3. Effects of knockdown of HOXB13 on methylmercury induced OSM expression.** (A) HEK293 cells were transfected with control siRNA or HOXB13 siRNA for 48 h and exposed to indicated concentrations of methylmercuric chloride (MeHgCl) for indicated time course. Quantitative PCR for OSM mRNA was performed. Represented data indicate relative value as control as 1, which normalized by each GAPDH mRNA level. All values are mean  $\pm$  S.D. of 3 individual experiment. \* $P < 0.05$  vs control (MeHgCl 0  $\mu$ M), \*\* $P < 0.01$  vs control (MeHgCl 0  $\mu$ M). † $P < 0.05$  vs Control siRNA, †† $P < 0.01$  vs Control siRNA.

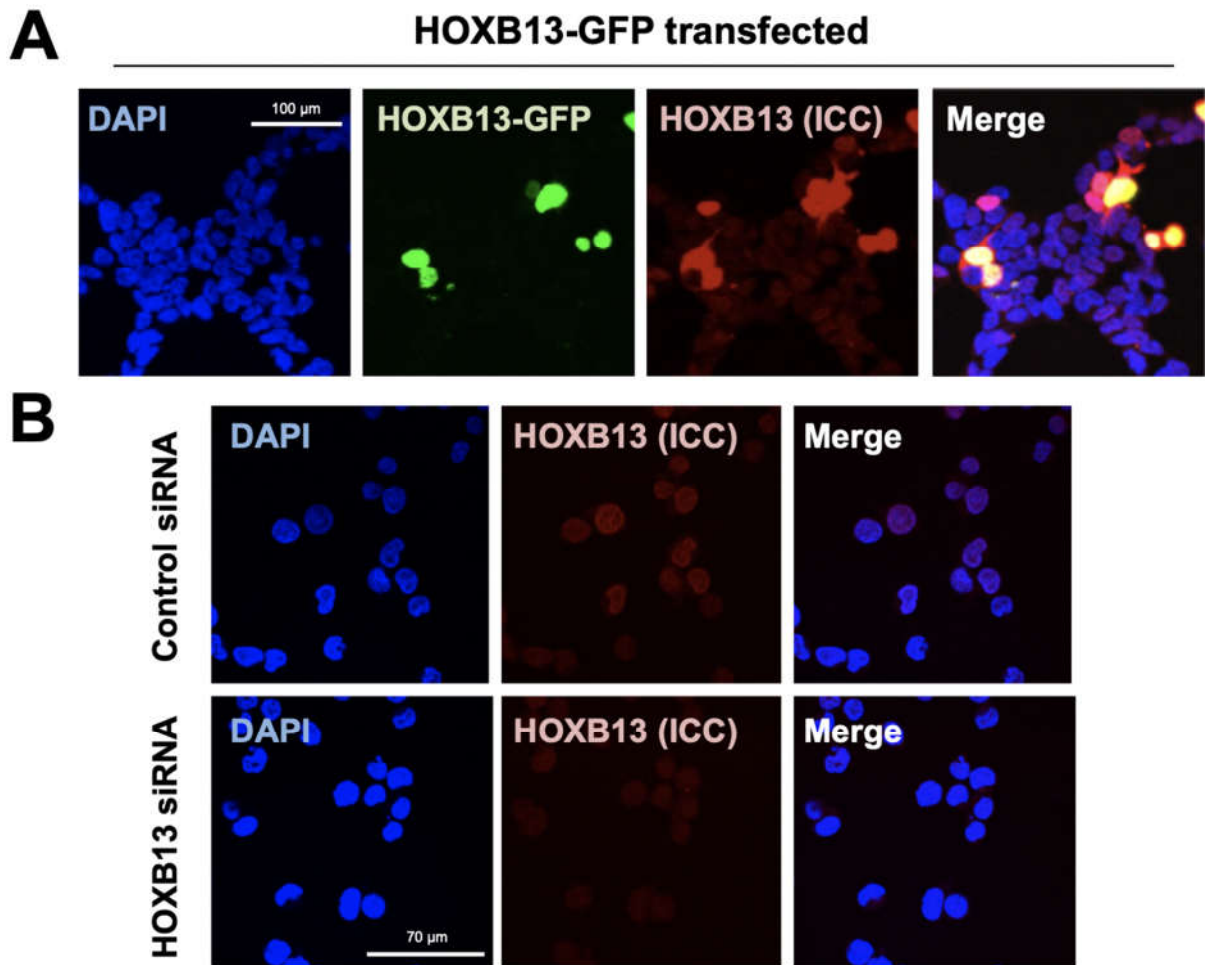

**Figure S4. Validation of immuno-fluorescence (IF) of HOXB13 in HEK923 cells**

HEK293 cells were seeded on glass slip and transfected with pEGFP-C2/human HOXB13 plasmid for 24 h (A) or HOXB13 siRNA for 48 h (B). Then IF was performed using HOXB13 antibody. Red indicates HOXB13, blue indicates DAPI and green indicates GFP. Scale bar indicates 70  $\mu\text{m}$ .

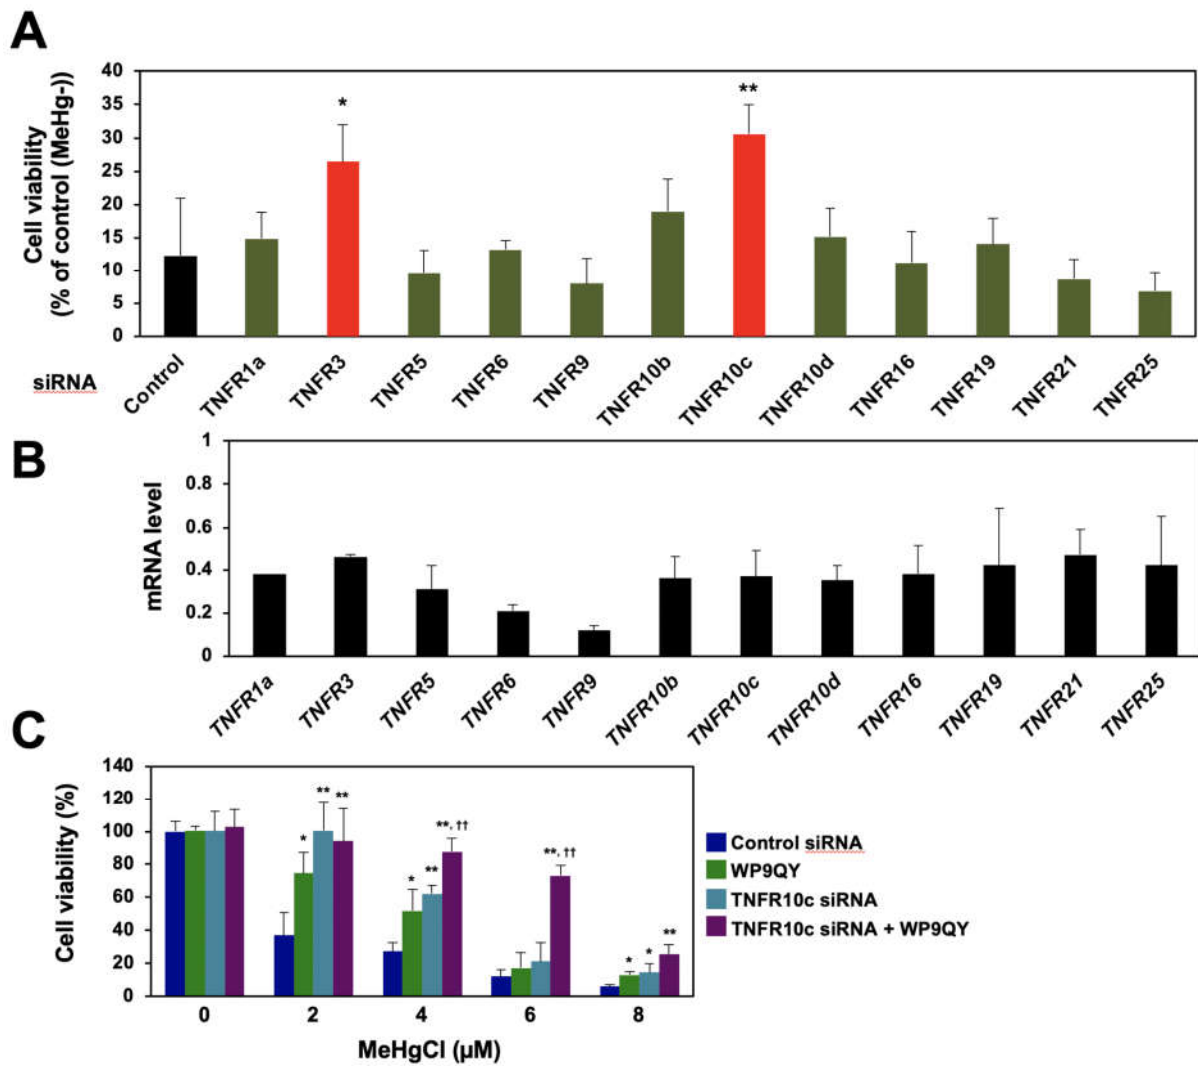

**Figure S5. Effects of knockdown of TNF receptors on cytotoxicity caused by methylmercury.** (A) HEK293 cells were transfected with indicated siRNA (equivalent mix of #1 and #2 siRNAs) for 48 h. The cells were exposed to 8 μM of methylmercuric chloride (MeHgCl) for 24 h and cell viability was measured by alamerBlue assay. The value of non-treated control cells was estimated as 100%. (B) mRNA level of siRNA transfected cells in (A) was measured by quantitative PCR. Represented data indicate relative value as each control as 1, which normalized by each GAPDH mRNA level. (C) The cells were transfected with TNFSF10c siRNA (equivalent mix of #1 and #2 siRNAs) for 48 h. WP9QY (10 μM) was added to the medium 90 min before the exposure of MeHgCl for 24 h. All values are represented as mean ± S.D. (n=3). \*P<0.05 vs control siRNA, \*\*P<0.01 vs control siRNA, †P<0.05 vs TNFRSF10c siRNA, ††P<0.01 vs TNFRSF10c siRNA.

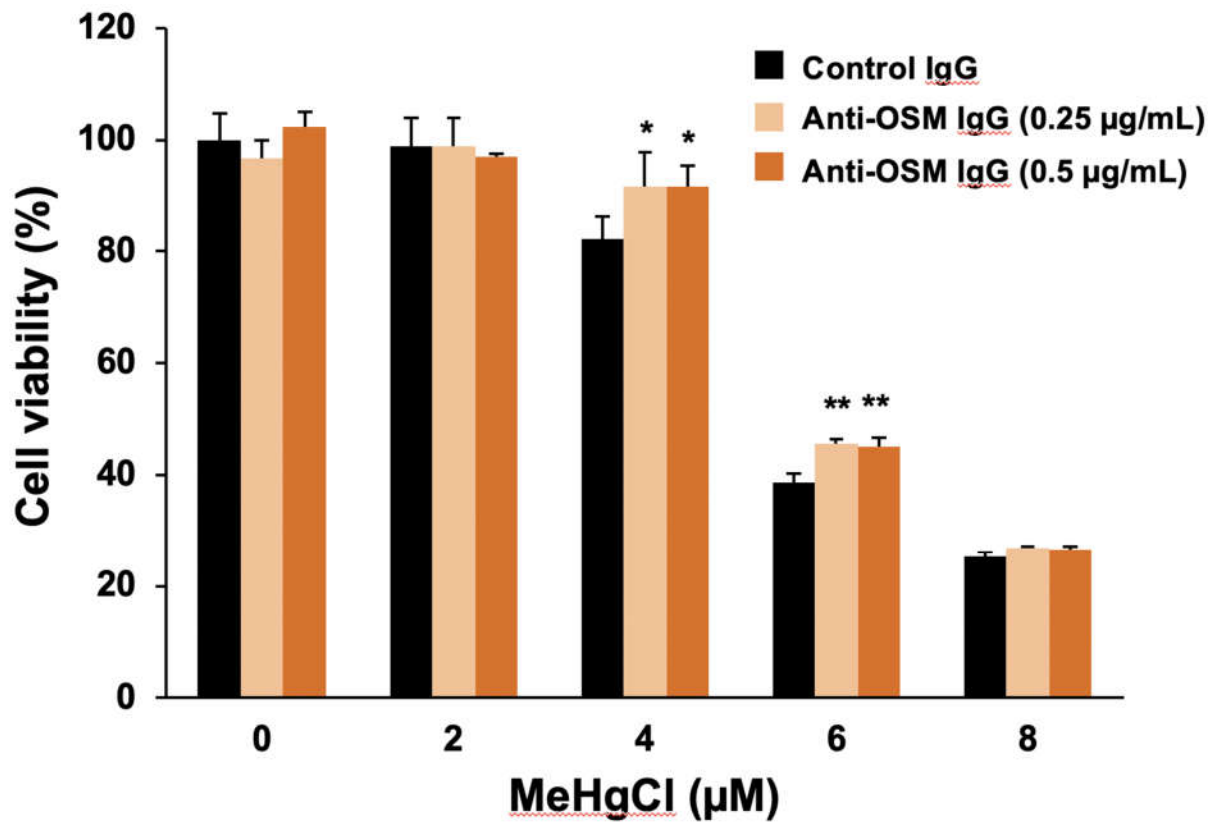

**Figure S6. Effects of neutralizing antibody against OSM on methylmercury induced cell death in C17.2 cells.** Neutralizing antibody against mouse OSM (AF-495-SP, R&D Systems) was added to the incubation medium of C17.2 cells. After 30 min, methylmercury was further added to the medium and incubated for 24 h. Cell viability was measured by alamerBlue assay. The value of non-treated control cells was estimated as 100%. All values are represented as mean  $\pm$  S.D. (n=3). \*P<0.05 vs control IgG, \*\*P<0.01 vs control IgG.
